# Supplementary material for: A new species of lotic breeding salamander (Amphibia, Caudata, Hynobiidae) from Shikoku, Japan
Source: PeerJ. 2022 Aug 26;10:e13891. doi: 10.7717/peerj.13891 (PMC9422979; doi:10.7717/peerj.13891)
Supplement: Supplemental Information 1 [file peerj-10-13891-s001.xlsx]

## Sheet: Sheet1
(Table S1. Raw measurements of Hynobius hirosei and H. oni.)
Specimen	Species	Locality No.	SEX	SVL	RHL	HW	MXHW	SL	LJL	IND	IOD	UEW	UEL	AGD	TRL	TAL	BTAW	MTAW	BTAH	MXTAH	MTAH	FLL	HLL	2FL	3FL	3TL	5TL	VTW	VTL	VTW/VTL	CG	LON	UJTN	LJTN	VTN
KUHE 61326	Hynobius hirosei	2	M	77.1	19	13.3	13.9	5.1	11	4.9	4	3.1	4.8	39.6	58.1	55.9	6.6	4.9	5.5	6.5	5.4	18.9	24.4	3.5	3.3	5.3	1.7	4.8	3.1	1.5	13	-1	68	68	41
KUHE 61356	Hynobius hirosei	2	M	100.5	22.6	14.5	15.8	5.5	13.3	5.8	5.1	3.5	5.5	54.9	79.2	79.6	8.1	4.9	5.2	8	6.9	22.1	28.6	4.2	4.1	6.2	2.7	5.8	3.4	1.7	14	-2.5	76	65	44
KUHE T2863	Hynobius hirosei	2	M	95.8	21.5	16.3	17.9	6.5	13.8	5.7	4.9	3.6	5.8	51.9	74.3	78.4	8.2	8	7.2	9.5	9.1	21.4	29.7	4.5	4.2	6.5	2.6	5.8	3.7	1.6	13	-2	78	77	44
KUHE T2864	Hynobius hirosei	2	M	89.9	21.1	15.2	16.8	5.8	13.3	6.5	4.6	3.5	5.3	46.6	68.8	76.8	7.9	6.5	6.4	8.4	8.3	22.1	28.5	4.5	4.3	6.6	2.6	5.6	3.1	1.8	13	-1	74	71	36
KUHE T2865	Hynobius hirosei	2	M	76.3	18	12.5	13.6	5.2	11.2	4.8	3.9	3.5	4.4	39.7	58.3	61.2	7.5	5.6	5.9	8.5	7.6	17.9	23	3.6	3.8	5.8	2.3	5	2.6	1.9	13	-1	73	74	37
KUHE T2867	Hynobius hirosei	2	M	99.8	22	16.2	17.6	6.4	13.9	6.1	5.5	3.7	6.2	52.7	77.8	80.4	9.8	7.5	8.3	11.4	9.4	22.2	29.7	4.3	3.9	6.5	3.3	6.6	4.1	1.6	13	-2	84	82	45
KUHE 8333	Hynobius hirosei	4	M	102.2	24.8	17.3	18.1	6.9	14.9	6.6	4.9	3.8	5.3	53	77.4	93.1	8.5	5.7	8.5	10.7	9.3	21.7	27.4	3.8	3.7	6.1	2.5	6.4	4	1.6	13	-2.5	78	71	42
KUHE 8334	Hynobius hirosei	4	M	90.8	20.3	14.2	15.6	5.7	13.2	5.3	4	3.2	4.6	47.3	70.5	77.4	7	4.3	5.5	8.7	7.9	21.4	25.6	4	3.3	5.6	2.5	5.3	3.4	1.6	13	-1.5	75	74	42
KUHE T3369	Hynobius hirosei	4	M	81.1	19.8	12.8	13.5	5.3	11.7	5	4.3	3.5	4.9	41.4	61.3	67.3	7	4.5	5.9	7.7	7.3	18.9	24.7	4.2	4	5.7	2.8	5.1	3.1	1.6	13	-1	80	79	37
KUHE T3470	Hynobius hirosei	4	M	95.9	22.4	13.8	15.4	5.9	12.4	5.9	4.7	3.7	5.5	49.8	73.5	77.8	8.4	6.8	7.2	10.3	8.8	20.3	28.5	3.6	4.1	6	3.2	5.5	4.3	1.3	13	-2.5	76	75	43
KUHE 9677	Hynobius hirosei	8	M	83.7	20.6	14.7	15.6	5.7	12.6	5	4.7	3	4.3	42.6	63.1	69.6	8.1	4.7	7.2	9.8	9.6	20.6	24.8	4.3	4.5	5.9	3.1	5.7	3.1	1.8	13	-1	70	65	0
KUHE 9678	Hynobius hirosei	8	M	88.6	21	13.9	15	6.3	12.9	5.1	5	3.4	5	44.3	67.6	76.7	8.5	5.3	8.2	11.4	10.6	20.1	26.2	4	4.1	5.7	2.9	5.9	3.6	1.6	13	-2	75	74	36
KUHE 9679	Hynobius hirosei	8	M	87.6	22.3	14.3	16	5.5	12.8	5.3	4.6	3.4	4.7	45.5	65.3	71.4	8	5.2	6.9	9.3	9.2	20.5	25.7	4.3	4.1	6.2	2.7	4.8	4.1	1.2	13	-2	74	70	40
KUHE 9680	Hynobius hirosei	8	M	84.3	19.5	14.9	15.9	5.9	13.1	5.1	4.6	3.6	4.7	44.9	64.8	56.5	7.9	5.1	7.1	11.6	10.5	20.9	25.3	3.7	4.3	6.1	2.6	5.4	3.3	1.6	13	-1.5	66	63	39
KUHE 9681	Hynobius hirosei	8	M	78.8	19.6	12.5	13.6	5	11.6	4.7	4.2	2.9	4.2	41	59.2	61.5	7.2	4.9	6.9	11	9.5	18.6	23.9	3.8	3.7	5.4	2.7	4.5	2.7	1.7	13	-1	72	71	34
KUHE 9682	Hynobius hirosei	8	M	78.5	19.1	13.7	14.1	5.1	11.2	4.6	4.1	3	3.9	41.9	59.4	65.7	6.8	4.8	6.4	9.3	8.6	18.9	24.4	3.9	3.9	5.7	2.6	4.9	3.2	1.5	13	-1	68	67	38
KUHE 9683	Hynobius hirosei	8	M	85.3	20.2	14.9	15.8	5.7	11.9	4.9	4.7	3.1	4.5	43.9	65.1	65.7	8.2	6.4	8	11.9	11.9	21.1	25.8	4	4.2	5.7	2.3	5	3	1.7	13	-2	73	77	39
KUHE 9684	Hynobius hirosei	8	M	88.9	20.7	14.8	15.6	5.6	13	5.4	4.7	3.4	4.8	47.3	68.2	75.3	7.8	5.2	7.3	12.2	10.6	20.9	25.4	4.4	4.2	6.2	3	5.8	3.6	1.6	13	-2.5	80	81	47
KUHE 9517	Hynobius hirosei	12	M	90.3	20.9	16	16.4	6.2	13.7	5.5	4.7	3.6	5.1	46.3	69.4	81.5	9	5.4	8.2	10.7	10.6	21.7	28	4.7	4.1	6.2	2.9	5.7	3.7	1.5	13	-1	77	76	44
KUHE 9518	Hynobius hirosei	12	M	86.6	20.4	14.7	15.9	6.2	12.2	5.6	4.4	3.4	5	45.4	66.2	74.8	7.7	5.2	7.8	9.8	9	20.6	26.2	4.8	4.2	6.2	2.8	5.8	3.5	1.7	13	-2	78	72	43
KUHE 9525	Hynobius hirosei	12	M	90.4	22.4	16.5	17.4	6.9	13.9	5.1	5.2	3.8	5.1	46.9	68	80.4	8.8	6.9	8.4	13.5	11.1	21.6	27.6	3.9	4.2	6	3	6	4.2	1.4	13	-1.5	80	84	54
KUHE 9528	Hynobius hirosei	12	M	79.2	19.7	13.9	14.8	5.8	12.6	5.1	4.6	3.3	4.2	41.6	59.5	71.1	8	7.1	7.9	12	11.8	18.8	25.3	3.8	3.2	6.2	2.6	4.9	3.8	1.3	13	-1.5	83	75	41
KUHE 9529	Hynobius hirosei	12	M	75.2	18.5	13.5	14.1	5.7	11.6	5.3	4.3	3.3	4.3	37.4	56.7	66.2	7.9	6.1	8	10.7	9.8	17.3	22.1	3.8	3.7	5.3	2.6	5.4	3.5	1.5	13	-1.5	79	82	47
KUHE 9530	Hynobius hirosei	12	M	77.2	19.5	13.8	14.2	5.1	11.4	5.4	3.9	3.3	4.5	40.7	57.7	65	7.1	4.8	6.8	9.1	8.7	18.5	23.5	3.6	3.6	5.6	2.5	5.3	3.1	1.7	13	-1	68	68	42
KUHE 9533	Hynobius hirosei	12	M	88.4	22.5	16.5	16.6	6.2	13.6	5.7	4.9	3.6	5.3	46.6	65.9	82.4	8.7	6.6	8.1	11.5	10.7	21.1	26.7	4.1	3.5	6.2	2.6	5.9	3.8	1.6	13	-1.5	77	71	43
KUHE 9534	Hynobius hirosei	12	M	84.1	19.3	14.6	15.5	5.7	12.7	5.1	4.4	3.4	4.5	43.1	64.8	66.9	7.3	5.8	6.7	10.1	10	19.8	24.8	3.7	3.1	5.9	2.9	5.7	3.4	1.7	13	-2	76	70	45
KUHE 9536	Hynobius hirosei	12	M	83.7	20.3	14	14.6	6.3	12.1	5.6	4.5	3.6	4.1	44.4	63.4	76.8	7.3	4.9	6.8	10.8	9.9	20.9	26.1	3.4	3.9	6	3.5	5.8	4.1	1.4	13	-1.5	73	63	44
KUHE 9538	Hynobius hirosei	12	M	75.6	18.2	13.3	14.2	4.8	11.2	4.7	4	3.5	4.7	40.8	57.4	63.2	7.9	5.2	7.2	10.3	9.4	17.7	22.3	3.1	3.4	5.2	1.9	5	3.3	1.5	13	-2	71	73	45
KUHE 2175	Hynobius hirosei	17	M	90.4	20.5	14.7	15.6	5.8	12.7	5.4	4.5	3.1	4.7	50.7	69.9	72.1	7.1	4.8	6.4	8.5	8.1	22.3	26.5	4.2	4	6.5	2.9	5.3	2.9	1.8	14	-1.5	74	63	37
KUHE 2177	Hynobius hirosei	17	M	76.1	18.4	13	14.4	5	11.7	4.8	4.5	3.4	4.5	40	57.7	69.2	7.4	4.9	5.9	10	8.7	19.4	24.6	3.9	4	5.7	2.7	5.2	2.4	2.2	13	-1	84	85	44
KUHE 24135	Hynobius hirosei	17	M	91	22.3	15	15.1	6	13.1	5.9	4.8	3.2	5.1	47.2	68.7	76.6	7.8	5.4	7.5	7.5	6.6	19.7	26.4	4	4.1	5.5	2.8	6.3	3.3	1.9	13	-2.5	91	70	56
KUHE 62827	Hynobius hirosei	17	M	89.5	21.1	13.8	14.3	5.9	12.4	5.7	4.5	3.4	5	49.3	68.4	79.4	6.6	4.8	5.4	9.3	7	22.4	27.4	4.1	4.5	6.8	3.6	5.2	4	1.4	13	-1.5	85	85	51
KUHE T2174	Hynobius hirosei	17	M	81.3	19.6	13.4	14.2	5.8	11.9	5.1	4.5	2.9	4.4	41.2	61.7	69.7	6.8	4.5	6.1	8.8	7.4	20.6	24	3.9	3.7	5.6	2.6	5.1	2.9	1.8	13	-1	78	73	44
KUHE T2176	Hynobius hirosei	17	M	82.3	19.8	14.6	15.9	6.1	13.3	5.2	4.9	3.4	4.7	43.3	62.5	78.2	7.9	6.3	7.2	10	9.5	21.3	25.5	3.8	4	5.8	2.8	5.5	3.2	1.7	12	-1	73	69	39
KUHE T2178	Hynobius hirosei	17	M	75.7	17.7	12.8	14.2	5.1	11.5	4.8	4	3.2	4	39.8	58	64.3	6.6	5.7	6.4	8.3	8.2	19.1	24.4	3.8	3.7	5.3	2.2	4.9	2.8	1.8	13	-1	67	72	42
KUHE T2180	Hynobius hirosei	17	M	85.5	19.2	15.4	15.7	5.5	12.4	5.5	4.5	3.2	4.8	45.5	66.3		8	6.2	7.2	8.7	8.3	21	25.5	4.2	3.8	5.8	2.9	4.9	3.4	1.4	13	-1.5	75	73	39
KUHE 24467	Hynobius hirosei	18	M	90.3	21.9	15.7	16.4	5.8	13.7	5.4	5	3.6	5.1	45.3	68.4		7.5	5.6	5.9	9.6	7.6	22.4	28.1	4	4.5	6.7	2.7	5.8	4	1.5	13	-0.5	73	63	40
KUHE T3002	Hynobius hirosei	18	M	91.3	21.3	14.9	15.1	6.1	13	4.8	4.7	3.2	5.3	45.7	70	84.8	7.4	5.3	6.8	8.5	7.9	22.5	26.5	4.5	3.9	6.3	2.9	5.5	3.7	1.5	12	-1	77	80	43
KUHE T3003	Hynobius hirosei	18	M	90.8	20.9	15.4	16.1	6.3	13.2	5.6	4.6	3.7	5.2	48.6	69.9	70.8	8.2	6.1	7.1	7.6	7.6	21.6	27.4	4.4	4.4	6.4	3.2	5.7	3.8	1.5	13	-1.5	82	72	43
KUHE T3004	Hynobius hirosei	18	M	83.3	20.3	14.9	15.6	5.7	12.8	5.6	4.4	3.6	5.1	43.2	63	73.9	6.8	4.9	6	7.9	7.8	19.9	25.7	4.1	3.9	5.7	2.7	5.8	3.2	1.8	13	-1	79	80	46
KUHE T3005	Hynobius hirosei	18	M	86.2	21.4	14.4	16	6	12.9	5.2	4.4	3.3	4.9	44.4	64.8	72.7	7	4.9	5.9	8.3	7.2	21.3	25.9	3.9	4	6.1	2.4	4.3	3.4	1.3	12	0	70	75	37
KUHE T3006	Hynobius hirosei	18	M	73	17.8	12.8	13	5.1	11	4.8	4	2.8	4.6	38.2	55.2	64.3	6.2	4.7	6	6.9	6.7	19.3	23.3	3.7	3.9	5.6	2.5	4.2	2.9	1.4	12	0	73	67	36
KUHE T3007	Hynobius hirosei	18	M	85.2	19.8	13.7	14.3	5.8	12	5.6	4.4	3.8	5.1	44.9	65.4	66.9	7.6	5.1	6.3	7.9	7.6	19.8	25.6	4.1	3.8	6.4	3.3	5.5	3.3	1.7	13	-2	72	71	48
KUHE 28086	Hynobius hirosei	20	M	80.5	20	13.5	14.7	5.3	11.6	5.3	4.3	3.5	4.6	42.2	60.5	66	7.3	5	5.9	7.6	7.2	20.6	25.4	3.8	4.3	6.4	3	5.4	3.2	1.7	12	-0.5	78	76	43
KUHE 57482	Hynobius hirosei	23	M	80.6	19.4	12.7	14	5.4	11.2	4.9	3.9	3.2	5	41.3	61.2	57.1	7.8	6.4	6.4	8.9	7.7	19	25.6	4	3.6	6.1	2.4	5	3.9	1.3	13	-1.5	72	68	40
KUHE 9523	Hynobius hirosei	12	F	93.1	21.8	15.1	15.4	5.6	13.7	5.4	4.8	3.5	4.9	50.4	71.3	80.7	8.2	5.3	6.6	9.5	9.3	20.7	27.5	3.8	4.4	5.4	2.9	5.6	4.7	1.2	13	-3	81	82	54
KUHE 9520	Hynobius hirosei	12	F	93.4	22	14.1	14.5	6.6	13	5.7	4.8	3.5	5.1	51	71.4	73.8	6.4	3.5	5.7	7.8	7.1	21.2	27.3	4.2	4.1	6.1	3.2	6.4	4.5	1.4	13	-2.5	79	76	59
KUHE 36931	Hynobius hirosei	2	F	101.3	21.9	16.8	17.2	6.4	14.1	6.3	5.3	3.7	5.4	57.2	79.4	80.1	9.9	8.2	7.2	9.6	9	22.5	29.2	3.9	4.3	6	3.4	5.8	3.3	1.8	13	-2	80	76	42
KUHE 36932	Hynobius hirosei	2	F	101.7	21.2	16.7	17.3	6.3	13.8	6.2	5.2	3.7	5.4	55.9	80.5	81.6	9.1	8	7.9	9.8	9.8	22.1	30.3	4.1	4.2	5.9	3.1	6	3.3	1.8	14	-3.5	83	78	45
KUHE 61325	Hynobius hirosei	2	F	101.8	23.2	15.6	16.3	6.3	13.2	6.3	5.1	3.8	5.6	55.2	78.6	78.7	7.7	4.9	6.9	8.1	7.8	22.8	29.1	4.8	4.2	7.3	3.4	6.3	4.3	1.5	13	-2	86	84	56
KUHE 61354	Hynobius hirosei	2	F	99.2	20.5	13.9	14	6	13	5.9	5	3.2	5.5	56.8	78.7	76.3	6.5	4	5.1	6.2	6.1	21.8	29.1	4.1	4.3	6.5	2.7	5.5	4	1.4	14	-3.5	83	81	52
KUHE 61355	Hynobius hirosei	2	F	93.6	21.1	13.5	14	5.9	12.6	5.2	4.6	3.6	5.1	51.3	72.5		7.5	5.8	6.3	7.7	6.9	20.5	27.8	3.7	4	6.1	2.4	5.6	3.7	1.5	13	-2.5	69	73	47
KUHE T3839	Hynobius hirosei	2	F	104.6	24.1	15.6	16.7	6.2	14.2	6.2	4.8	4.1	5.8	57.8	80.5	82	7.1	3.9	5.7	6.7	6.6	23.1	28.3	4.2	4.6	6.4	3.1	5.9	3.8	1.6	14	-3	81	79	53
KUHE 26240	Hynobius hirosei	4	F	98.1	23.9	16.5	17.2	6.8	13.7	6.2	4.6	3.9	5.7	50.7	74.2	76	8.3	6.4	6.9	8.6	7.8	22.6	28.3	4.3	4.3	7	2.7	6.5	4.2	1.5	13	-1.5	88	88	53
KUHE 9519	Hynobius hirosei	12	F	91.4	20.6	14.6	15.1	6.4	13.2	5.6	4.6	3.2	4.8	51.3	70.8	73.4	7.3	4.9	6.8	9.2	8.6	19	24.6	3.5	3.7	5.7	2.5	5.4	3.3	1.6	14	-3	77	75	37
KUHE 9521	Hynobius hirosei	12	F	95.5	22.8	15.5	15.9	6	13.8	6	5.1	3.7	5.2	51.7	72.7	78.1	8.1	5.3	7.5	11.8	11.6	20.7	26.9	4	4.1	6.3	4	6.4	4.7	1.4	13	-3.5	84	86	60
KUHE 9522	Hynobius hirosei	12	F	88.9	21.2	13.1	14.2	5.2	12.4	5.3	4.4	3.5	4.6	47.4	67.7	69.1	6.8	4.5	5.8	9.1	8.4	18.7	26.6	3.8	3.9	6	3.2	5.3	3.5	1.5	13	-2.5	72	73	43
KUHE 9524	Hynobius hirosei	12	F	82.3	19.5	13.3	14	5.7	11.6	5.4	4.1	3.5	4.6	44.8	62.8	64.1	6.4	3.8	5.9	9	8.3	19.1	24.9	3.5	3.9	5.4	2.9	5	3.5	1.4	14	-3	80	81	35
KUHE 9532	Hynobius hirosei	12	F	92.7	21.6	14.7	15.4	5.6	13	5.6	4.6	3.2	4.4	49.3	71.1	74.2	8	4.7	6.6	9.9	9	20.1	25.6	3.3	3.5	5.3	2.7	5.2	3.3	1.6	13	-3	79	73	44
KUHE 9535	Hynobius hirosei	12	F	93.7	21	14.7	15.3	5.5	13.1	5.6	4.9	3.7	4.9	51.9	72.7	75	7.3	5.3	7.1	10.1	10	18.7	25.1	3.7	3.1	5.5	2.6	6.1	3.3	1.8	13	-3	71	68	45
KUHE 9537	Hynobius hirosei	12	F	92.2	21.3	14.8	15.8	6.2	12.7	5.2	4.6	3.5	4.9	47.8	70.9	79.3	8.2	5.5	7.4	10.4	10.2	20.8	26.6	3.8	4	6.1	2.8	5.9	3.4	1.7	14	-3.5	66	64	40
KUHE 9539	Hynobius hirosei	12	F	99.1	22	14.9	15.5	6.5	13.6	5.5	4.6	3.7	5.1	52.7	77.1	79.7	8	6.3	7.1	9.2	8.9	20.6	27.3	3.4	3.6	5.8	2.9	5.6	3.6	1.6	13	-4	82	81	48
KUHE T2179	Hynobius hirosei	17	F	98.7	21.4	16.5	15.9	6.2	13.2	6	5	3.9	5.2	52.2	77.3	78.5	7.9	5.6	7	7.9	7.7	23.3	30.1	3.8	4.4	7	3.1	5.5	3.9	1.4	13	-2	93	89	53
KUHE 62826	Hynobius hirosei	18	F	95.8	22.4	14.4	15.1	6.5	12.9	6.1	4.5	3.3	5.3	51.6	73.4	79.4	7.4	4.4	5.7	7.7	7.5	22.8	27.7	4.1	4.3	5.9	2.2	5.5	3.7	1.5	13	-2	81	79	47
KUHE 62840	Hynobius hirosei	18	F	87.7	20.4	13.5	14.2	6.1	12.3	5.5	4.3	3.4	4.9	46.4	67.3	70.6	5.8	3.1	4.4	5.4	5.4	21.1	27	4.1	4	6.7	2.5	5.1	3.2	1.6	13	-1	73	69	34
KUHE 62841	Hynobius hirosei	18	F	96.8	22	15	15.7	6.3	12.8	6	4.7	3.7	5.7	53.6	74.8	78	7.5	4.9	5.7	7.6	7	22.5	29.5	4.5	4.4	7.2	3.1	5.8	4	1.5	14	-2	82	75	52
KUHE 62842	Hynobius hirosei	18	F	89.4	20.6	13.4	13.8	6.1	12.8	5.5	4.4	3.1	5	48.8	68.8	77.7	6.7	4.4	5.1	6.9	6.8	22.1	28.3	4	4	6.4	2.6	5.1	3.4	1.5	13	-1	72	69	40
KUHE T3008	Hynobius hirosei	18	F	92.4	21.8	15	15	6.3	12.5	5.5	4.8	3.2	5	50.7	70.6	64.9	6.3	4.8	5.5	6	5.8	21.4	27.4	4.1	4.2	6.4	2.9	5.2	3.1	1.7	13	-1.5	74	72	42
KUHE 57481	Hynobius hirosei	23	F	87.4	19.3	14.1	15.3	5.5	12.8	5.5	4.7	3.4	5.1	47.5	68.1	64.9	9.1	8.1	8.2	10.6	10	20.1	25.2	3.6	3.9	5.9	2.9	5.1	4	1.3	13	-3	92	93	50
KUHE 57483	Hynobius hirosei	23	F	85.3	19.3	14.2	14.7	5.2	11.5	5.2	4.3	3.5	5	46.6	66	61.3	6.7	5.1	6.2	8	7.1	20.4	26.1	3.6	3.6	6.2	2.7	4.9	3.4	1.4	13	-2	72	76	37
KUHE 61098	Hynobius oni	24	M	77.6	18.3	12.6	13.1	4.8	11.1	4.8	4.7	3.1	4.8	40.3	59.3	57.2	7.8	5.6	7	8.2	7.7	19.3	24.6	3.5	3.5	5.7	2.1	4.8	3.2	1.5	12	-1	81	77	39
KUHE 62327	Hynobius oni	24	M	81.2	19.4	12.8	13.3	5.5	12.1	4.7	4.5	3	4.5	42.8	61.8	61	7.7	5.9	6.6	8.4	8.3	18.3	24.1	3.6	3.6	5.6	2.1	4.5	2.7	1.6	13	-2	74	75	40
KUHE 62784	Hynobius oni	24	M	84.7	19	14	15.1	5.5	12.4	4.8	4.1	3.2	5.1	46.4	65.7	58	7.6	5.3	6.2	7.7	7.1	18.4	25.4	3.6	3.3	5.4	2.1	5.2	3.5	1.5	13	-2			44
KUHE 62785	Hynobius oni	24	M	82.7	18.6	13.6	14.2	5.4	11.2	4.6	4.2	2.9	4.9	45	64.1	66.3	8.4	6.2	6.5	9.3	8.6	19.4	24.5	3.7	3.5	5.9	2.5	4.8	3.6	1.3	13	-2	71	67	43
KUHE 62786	Hynobius oni	24	M	79.1	18	13.9	15.1	5.1	11.2	4.6	4.4	3.1	4.8	42.4	61.1	61.6	7.5	6	6.3	9.5	7.3	19.3	23.8	3.3	3.3	5.5	2.7	4.9	3.1	1.6	13	-2	73	75	40
KUHE 62787	Hynobius oni	24	M	78.8	19.3	13.3	13.9	5.6	11.4	4.7	4.3	3.1	4.7	41.9	59.5	61.9	7.5	5.9	6.2	7.9	7.4	19.9	26.8	3.8	4	5.8	2.7	5.1	2.6	2	13	0	83	89	44
KUHE 62788	Hynobius oni	24	M	80.1	18.6	13.3	14.2	5.6	12.2	4.9	4.3	3.2	4.7	43.8	61.5	65.6	7.2	5	6.1	8.1	7.9	20.7	26.7	3.7	3.9	5.9	2.7	5	2.9	1.9	13	-0.5	81	74	46
KUHE 62789	Hynobius oni	24	M	87.5	20	14.1	14.6	5.3	11.9	4.9	4.5	3.4	4.8	48	67.5	71.3	7.6	6.3	6.6	9.9	9.1	20.4	26.7	3.7	3.5	5.4	2.4	5.4	3.9	1.4	13	-2	87	79	53
KUHE 62790	Hynobius oni	24	M	76.8	19	12.9	14.3	5	11.6	4.5	3.8	3	4.4	42.4	57.8	64.9	7	5	5.5	7.1	6.4	17.8	24.9	3.2	3.4	5	2	4.8	2.8	1.7	12	-1.5	65	62	33
KUHE 62791	Hynobius oni	24	M	73.6	18.5	12.7	13.2	4.6	10.9	4.4	3.6	2.7	4.5	40.6	55.1	61.8	6.8	4.7	5.5	6.2	6.2	18.1	23.6	3.5	3.3	5.6	2.2	4.9	3	1.6	13	-1	80	74	43
KUHE 62792	Hynobius oni	24	M	74	18.1	11.9	12.5	4.7	10.3	4.6	3.8	2.9	4.3	39.4	55.9	59.7	7	5.2	6.1	7.9	7.8	18.6	22.1	3.6	3.6	5.2	2.3	4.3	3	1.4	13	-1	76	76	39
KUHE 61096	Hynobius oni	26	M	76.4	17.3	13.4	14.4	5.2	10.7	4.8	4.3	2.7	4.9	40.9	59.1	61.6	7.2	5.2	7.3	7.6	7.5	18.8	24.2	3.9	3.8	5.7	2.8	4.9	3.2	1.5	13	-1	67	76	40
KUHE 61097	Hynobius oni	24	F	84.6	20.3	13.9	15.2	5.2	11.8	5	4.2	2.8	4.9	44.4	64.3	65.9	6.6	4.3	5.6	5.9	5.3	19.5	26.1	4	3.5	5.9	2.8	5.2	3.3	1.6	13	-2	83	84	50
